# Supplementary material for: Obesity and Gray Matter Volume Assessed by Neuroimaging: A Systematic Review
Source: MDPI journal article supplement (doi:10.3390/brainsci11080999), 2021-07-28
Supplement: s1 [file s1]

**Table S1.** Summarized confounder's adjustment of the studies included in this review. Articles are shown in chronological order.

| YEAR,<br>FIRST AUTHOR   | CONFOUNDER'S ADJUSTMENT                                                                                                                                                                                                                                                                                                         |
|-------------------------|---------------------------------------------------------------------------------------------------------------------------------------------------------------------------------------------------------------------------------------------------------------------------------------------------------------------------------|
| 2019, Franz CE [21]     | Age, lifetime education, ethnicity, smoking status and being at-risk for hypertension, dyslipidemia, DM, inflammation, and/or ischemic heart disease at Time 4.                                                                                                                                                                 |
| 2019, Westwater ML [49] | Age, sex, education, age-adjusted BMI Z-score.                                                                                                                                                                                                                                                                                  |
| 2018, Saute RL [51]     | Age, sex and TIV.                                                                                                                                                                                                                                                                                                               |
| 2017, de Groot CJ [52]  | Age, sex and false discovery rate.                                                                                                                                                                                                                                                                                              |
| 2017, Opel N [41]       | Age, sex                                                                                                                                                                                                                                                                                                                        |
| 2017, Hayakawa, YK [53] | Age, MMSE, TIV, BMI and WC.                                                                                                                                                                                                                                                                                                     |
| 2017, Zhang B [54]      | -                                                                                                                                                                                                                                                                                                                               |
| 2017, Wang H [55]       | Age, sex and handedness                                                                                                                                                                                                                                                                                                         |
| 2016, Ronan L [56]      | Age, sex, educational level, income; current smoking (not included as a controlled parameter due to low number of smokers, with similar distribution between groups), physical activity; SPB, DBP; myocardial infarction, cancer, DM, stroke, hypercholesterolemia, HBP, cognitive impairment; TIV, gray-white-matter contrast. |
| 2016, Medic N [42]      | Age, sex.                                                                                                                                                                                                                                                                                                                       |
| 2016, Masouleh SK [6]   | Age, sex; Mean SPB, smoking status, depression, educational level; HBP or antihypertensive medication, DM (type 1 or 2), antihyperlipidemic medication, estrogen supplements, cardiovascular diseases; white matter hyperintensities; APOE e4-alleles.                                                                          |
| 2015, Kim HJ [57]       | Age, educational level, smoking status, alcohol consumption; SPB, DBP, fasting blood sugar, cholesterol level, postmenopausal state; HBP, DM, hyperlipidemia, previous stroke, cardiovascular disease, intracranial volume                                                                                                      |
| 2015, Janowitz D [50]   | Age, sex; SBP, DBP, HBP or antihypertensive medication, DM type 2 or antidiabetic medication, LDL, HDL, total cholesterol.                                                                                                                                                                                                      |
| 2015, Kaur S [58]       | Age, SBP, total cholesterol, blood glucose level                                                                                                                                                                                                                                                                                |
| 2015, Shott ME [59]     | Age                                                                                                                                                                                                                                                                                                                             |
| 2015, Kim H [60]        | Age, education level, hypertension, DM, hyperlipidemia, previous stroke, cardiovascular disease, smoking status, drinking and smoking status, SBO, DBP, fasting blood sugar, cholesterol, ICV.                                                                                                                                  |
| 2014, Veit R [43]       | Sex, age, educational level, total surface area; BMI (for VAT).                                                                                                                                                                                                                                                                 |
| 2014, Yau PL [7]        | Sex, ICV, hypertension.                                                                                                                                                                                                                                                                                                         |
| 2014, Debette [61]S     | Age, gender, ICV, SPB, antihypertensive treatment, smoking, DM, LDL, HDL, log-transformed triglycerides, lipid lowering treatment, history of vascular disease                                                                                                                                                                  |
| 2014, Bobb JF [25]      | Race, ApoE4 status, age, smoking status, ICV, BMI                                                                                                                                                                                                                                                                               |
| 2014, Lou B [44]        | Age, sex.                                                                                                                                                                                                                                                                                                                       |

|                              |                                                                          |
|------------------------------|--------------------------------------------------------------------------|
| 2013, Marqués-Iturria I [45] | Age, educational level                                                   |
| 2013, Kurth F [46]           | Age, sex.                                                                |
| 2013, Brooks SJ [8]          | Sex, BMV, educational status, DM.                                        |
| 2013, Weise CM [47]          | Age, sex and handedness.                                                 |
| 2012, Mueller K [62]         | Age, total GMV, serum soluble leptin receptor level.                     |
| 2012, Smucny J [63]          | Age, sex, and ICV.                                                       |
| 2012, Yokum S [29]           | Initial BMI, 1-year-change BMI, total GMV.                               |
| 2012, Hassenstab JJ [64]     | Age, sex, antihypertensive medication                                    |
| 2010, Walther K [9]          | Age, ICV, hypertension.                                                  |
| 2009, Narita K [65]          | Age, sex, BMI, WHR, ICV.                                                 |
| 2008, Taki Y [66]            | Age, sex, drinking status, hypertension, DM                              |
| 2007, Pannacciulli [48]N     | Age, sex, % body fat, fasting plasma insulin concentrations, global GMV. |
| 2006, Pannacciulli N [22]    | Age, sex, handedness, global tissue density.                             |

APOE: Apolipoprotein E; Body fat %: Body fat percentage; BMI: Body mass index (kg/m<sup>2</sup>); BMV: Brain matter volume; DBP: Diastolic blood pressure; DM: Diabetes mellitus; FFMI: Fat-free mass index (kgm<sup>2</sup>); FMI: Fat mass index (kgm<sup>2</sup>); GMV: Gray matter volume; HBP: High blood pressure; ICV: Intracranial volume; M: Men; MMSE: Mini-mental State Examination; MoCA: Montreal Cognitive Assessment; NSE: Neuron-specific enolase; P: Percentile; P16: percentile 16; Q: Quartil; Qi: Quintil; SAT: Subcutaneous adipose tissue; SD: Standard deviation; SPB: Systolic blood pressure; T: Tertile; TIV: Total intracranial volume. VAT: Visceral adipose tissue; VFM: Visceral fat mass (g); VFV: Visceral fat volume (cm<sup>3</sup>); W: Women; WC: Waist circumference (cm); WHR: Waist-to-hip ratio.
